# Supplementary material for: On Representing Extreme Experiences in Writing and Translation: Omid Tofighian on Translating the Manus Prison Narratives
Source: MDPI journal article supplement (doi:10.3390/h11060141), 2022-11-10
Supplement: s1 [file s1]

### **Selection of Boochani's and Tofighian's Writings (in Addition to Some Collaborators)**

- Bennett, Stephanie, and Omid Tofighian. 2020. Translation as Freedom, Experimentation and Sharing: Omid Tofighian on Translating *No Friend but the Mountains*. *Biography* 43: 748–54.
- Boochani, Behrouz. 2017. A kyriarchal system: New colonial experiments/new decolonial resistance. *9th Annual Maroon Conference Magazine*. Translated by Omid Tofighian. Charles Town: Charles Town Maroon Council, pp. 20–22. Available online: <https://ctmcweb2020.maroons-jamaica.com/magazine-2017/> (accessed on 1 November 2021).
- Boochani, Behrouz. 2017. A Letter from Manus. *The Saturday Paper*, 9 December. Translated by Omid Tofighian. Available online: <https://www.thesaturdaypaper.com.au/news/politics/2017/12/09/letter-manus-island/15127380005617> (accessed on 9 December 2017).
- Boochani, Behrouz. 2017. An Island Off Manus. *The Saturday Paper*, 6 May. Translated by Moones Mansoubi. Available online: <https://www.thesaturdaypaper.com.au/2017/05/06/island-manus/14939928004582> (accessed on 6 May 2017).
- Boochani, Behrouz. 2017. Diary of disaster: The last days inside Manus Island Detention Centre. Translated by Omid Tofighian. *The Guardian*, 30 October. Available online: <https://www.theguardian.com/commentisfree/2017/oct/30/diary-of-disaster-the-last-daysinside-manus-island-detention-centre> (accessed on 5 February 2022).
- Boochani, Behrouz. 2017. 'This Is Hell Out Here': Behrouz Boochani's Diaries Expose Australia's Refugee Shame. *The Guardian*, 4 December. Translated by Moones Mansoubi and Omid Tofighian. Available online: <https://www.theguardian.com/world/2017/dec/04/this-is-hell-behrouz-boochani-diaries-expose-australia-refugee-shame> (accessed on 4 December 2017).
- Boochani, Behrouz. 2018. Manus prison poetics/our voice: Revisiting 'a letter from Manus Island', a reply to Anne Surma. Translated by Omid Tofighian. *Continuum: Journal of Media and Cultural Studies* 32: 527–31.
- Boochani, Behrouz. 2018. *No Friend but the Mountains: Writing from Manus Prison*. Translated by Omid Tofighian. With translator's note and essay. Sydney: Picador.
- Boochani, Behrouz. 2018. Manus Prison theory. Translated by Omid Tofighian. *The Saturday Paper*, 11–17 August. Available online: <https://www.thesaturdaypaper.com.au/opinion/topic/2018/08/11/manus-prisontheory/15339096006690> (accessed on 5 February 2022).
- Boochani, Behrouz. 2023. *Freedom, Only Freedom: The Prison Writings of Behrouz Boochani*. Translated and edited by Omid Tofighian and Moones Mansoubi. London: Bloomsbury Academic. Forthcoming.
- Boochani, Behrouz, and Arash Kamali Sarvestani (dirs). 2017. *Chauka, Please Tell Us the Time*. Film. Netherlands: Sarvin Productions.
- Boochani, Behrouz, and Omid Tofighian. 2018. The last days in Manus Prison. *Meanjin* 77: 32–45. Available online: <https://meanjin.com.au/essays/the-last-days-in-manus-prison/> (accessed on 1 November 2021).
- Boochani, Behrouz, and Omid Tofighian. 2019. Manus Prison theory: Borders, incarceration and collective agency. *Griffith Review* 65. Available online: <https://www.griffithreview.com/articles/manus-prison-theory/> (accessed on 11 December 2020).

- Boochani, Behrouz, and Omid Tofighian. 2019. No friend but the mountains: Translation as literary experimentation and shared philosophical activity. In *In the Shoes of the Other: Interdisciplinary Essays in Translation Studies from Cairo*. Edited by Samia Mehrez. Cairo: Al Kotob Khan.
- Boochani, Behrouz, and Omid Tofighian. 2020. 'A human being feels they are on a precipice': COVID-19's Threshold Moment. 16th June. Sydney: *Andrew and Renata Kaldor Centre for International Refugee Law*, UNSW Law. Available online: <https://www.kaldorcentre.unsw.edu.au/publication/%E2%80%98human-being-feels-they-are-precipice%E2%80%99-covid-19%E2%80%99s-threshold-moment> (accessed on 11 December 2020).
- Boochani, Behrouz, and Omid Tofighian. 2020. No Friend but the Mountains and Manus Prison Theory: In Conversation. *Borderlands Journal* 19: 8–26.
- Boochani, Behrouz, Diana Flores, Agatha Sibanda, Victor Mujakachi, Temboman, Fafa, Rosie Huzzard, Lauren Cape-Davenhill, Ala Sirriyeh, Hannah Lewis, Gwyneth Lonergan, Deirdre Conlon, Bruce Bennett, Omid Tofighian. 2020. Transnational Communities for Dismantling Detention: From Manus Island to the UK. *Community Psychology in Global Perspective*, 6, 1: 108–28.
- Boochani, Behrouz, Tazreiter Claudia, and Tofighian Omid. 2021. The multiple faces of the people smuggler. In *SMUGGLED: An Illegal History of Journeys to Australia*. Edited by Ruth Balint and Julie Kalman. Sydney: New South Press.
- Galbraith, Janet, Hani Abdile, Omid Tofighian, and Behrouz Boochani (eds). 2021. *Southerly 79-2, Writing Through Fences: Archipelago of Letters*.
- Mansouni, Moones. 2020. Translating Manus and Nauru: Refugee Writing. *Artseverywhere*, 7 September. Available online: <https://www.artseverywhere.ca/manus-nauru/> (accessed on 5 February 2022).
- Tazreiter, Claudia, Tofighian Omid, and Boochani Behrouz. 2021. Spectres of subjugation/inter-subjugation/resubjugation of people seeking asylum: The kyriarchal system in Australia's necropoleis. *Regulating Refugee Protection through Social Welfare Law, Policy and Praxis*. Edited by Peter Billings. London: Routledge.
- Tofighian, Omid. 2018. Behrouz Boochani and the Manus Prison narratives: Merging translation with philosophical reading. *Continuum: Journal of Media and Cultural Studies* 32: 532–40.
- Tofighian, Omid. 2018. No friend but the mountains: Translator's reflections. In *No Friend but the Mountains: Writing from Manus Prison*. Edited by Behrouz Boochani. Translated by Omid Tofighian. Sydney: Picador, pp. 359–74.
- (Tofighian 2018c) Tofighian, Omid. 2018c. Sanctions, refugees and the marginalised: Iran uprisings are Australia's concern too. *ABC News*, 6 January. Available online: <http://www.abc.net.au/news/2018-01-06/iran-uprising-australianamanusisland-political-refugees-islamic/9305756> (accessed on 1 November 2021).
- Tofighian, Omid. 2018. Translator's tale: A window to the mountains. In *No Friend but the Mountains: Writing from Manus Prison*. Edited by Behrouz Boochani. Translated by Omid Tofighian. Sydney: Picador, pp. xi–xxxiv.
- Tofighian, Omid. 2019. Behrouz Boochani and the politics of naming. *Australian Book Review* 413, August. Available online: <https://www.australianbookreview.com.au/abr-online/archive/2019/371-august-2019-no-413/5688-behrouz-boochani-and-the-politics-of-naming-by-omid-tofighian> (accessed on 1 November 2021).
- Tofighian, Omid. 2019. Chauka calls—A photo essay. *Alphaville: Journal of Film and Screen Media* 18: 205–217. <https://doi.org/10.33178/alpha.18.19>.

- Tofighian, Omid. 2019. Displacement, exile and incarceration commuted into cinematic vision. *Alphaville: Journal of Film and Screen Media* 18: 91–106.
- Tofighian, Omid. 2019. Disregard, dismissal and divestment: Behrouz Boochani, academia and the media. *PEN International*, 20 June. Available online: <https://pen-international.org/news/disregard-dismissal-anddivestment-behrouz-boochani-academia-and-the-media> (accessed on 1 November 2021).
- Tofighian, Omid. 2020. Introducing Manus Prison theory: Knowing border violence. *Globalizations* 17: 1138–56.
- Tofighian, Omid, and Behrouz Boochani. 2021. *The Weaponisation of Time: Indefinite Detention as Torture*. In *Stealing Time: Migration, Temporalities and State Violence*. Edited by Victoria Canning and Monish Bhatia. London: Palgrave Macmillan.
- Tofighian, Omid, and Behrouz Boochani. 2020. Narrative, Resistance and Manus Prison Theory. *Review of Middle East Studies Pluralism in Emergencies* 54: 174–95.
- Tofighian, Omid, Behrouz Boochani, Mira, and Elahe Zivardar. 2022. Narratives of Resistance from Indefinite Detention: Manus Prison Theory and Nauru Imprisoned Exiles Collective. In *The Big Anxiety: Taking Care of Mental Health in Times of Crisis*. Edited by Jill Bennett. London: Bloomsbury Academic.
- Tofighian, Omid, Rachael Swain, Dalisa Pigram, Bhenji Ra, Chandler Connell, Emmanuel James Brown, Feras Shaheen, Issa El Assaad, Luke Currie-Richardson, Miranda Wheen, and et al. 2022. Performance as Intersectional Resistance: Power, Polyphony and Processes of Abolition. *Humanities* 11: 28. <https://doi.org/10.3390/h11010028>.
- Tofighian, Omid. 2021. Arriving to Depart. In *Waiting—A Project in Conversation*. Edited by Shahram Khosravi. Bielefeld: Transcript Verlag.
- Tofighian, Omid. 2021. Australian Border Violence, Race and Translating *No Friend but the Mountains*: Al Ahram Interviews Omid Tofighian in Cairo. *Southerly* 79-2, Writing Through Fences: Archipelago of Letters.
- Tofighian, Omid. 2021. Horrific Surrealism: New Storytelling for Australia's Carceral-Border Archipelago. In *Marrugeku: Telling That Story—25 years of Trans-Indigenous and Intercultural Performance*. Edited by Helen Gilbert, Dalisa Pigram, and Rachael Swain. Wales: Performance Research Books, pp. 306–1019.
- Tofighian, Omid. 2021. Silent deaths—Creative resistance. In *Handbook on Migration and Global Justice*. Edited by Claudia Tazreiter and Leaanne Weber. Cheltenham: Edward Elgar.
- Tofighian, Omid. 2023. Writing in Languages of Freedom. In *Freedom, Only Freedom: The Prison Writings of Behrouz Boochani*. Translated and edited by Omid Tofighian and Moones Mansoubi. London: Bloomsbury Academic. Forthcoming.
