# Supplementary material for: On Representing Extreme Experiences in Writing and Translation: Omid Tofighian on Translating the Manus Prison Narratives
Source: MDPI journal article supplement (doi:10.3390/h11060141), 2022-11-10
Supplement: s1 [file s1]

Archive with 1 entries (1 files):
- humanities-1885255-SM.pdf
